# Supplementary material for: Thiacalixarene-based {Co/Fe}16 coordination clusters: bimetallic synergistic effect for an enhanced oxygen evolution reaction
Source: Royal Society of Chemistry journal article supplement (doi:10.1039/d2qi01885c), 2022-12-02
Supplement: d2qi01885c1.pdf [file d2qi01885c1.pdf]

**Thiacalixarene-based {Co/Fe}<sub>16</sub> molecular clusters: the bimetallic synergistic effect for enhanced oxygen evolution reduction**

Xinxin Hang<sup>a,b</sup>, Xiaoju Wang<sup>a</sup>, Meiling Wang,<sup>b</sup> Mengwei Chen<sup>b</sup>, Yanfeng Bi<sup>\*b</sup>

<sup>a</sup> *School of Chemistry and Chemical Engineering, Institute for Innovative Materials and Energy, Yangzhou University, Yangzhou, Jiangsu 225002, (P. R. China)*

<sup>b</sup> *School of Petrochemical Engineering, Liaoning Petrochemical University, Fushun, Liaoning 113001 (P. R. China)*

## Additional Figures

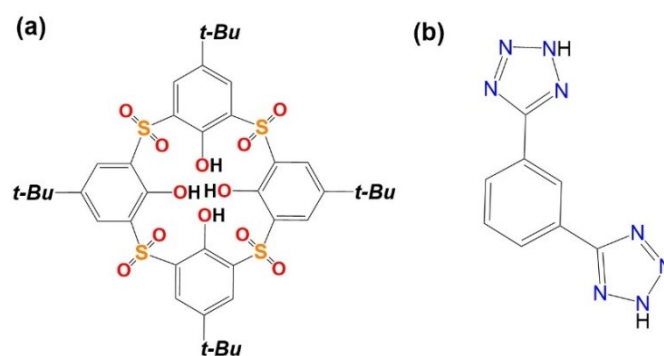

**Scheme S1.** Molecular structures of  $H_4TC4A-SO_2$  (a) and  $H_2BTTAB$  (b).

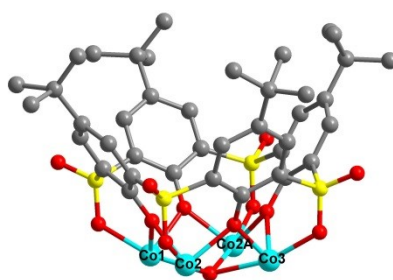

**Figure S1.** The structure of  $Co_4-(TC4A-SO_2)$  PSBU.

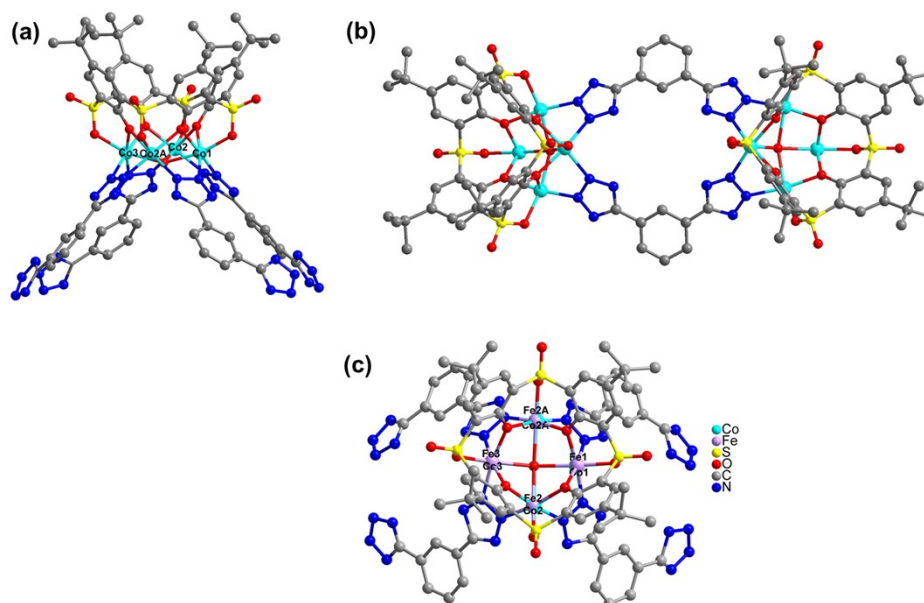

**Figure S2.** The coordination modes of (a)  $Co_4-(TC4A-SO_2)$  unit, (b) BTTAB ligand in  $Co_{16}$  and (c)  $(Co/Fe)_4-(TC4A-SO_2)$  unit in  $\{CoFe\}_{16-b}$ . Symmetry operators for equivalent positions are as follows:  $A = x, 1-y, 1-z$  for  $Co_{16}$  and  $A = x, y, 2-z$  for  $\{CoFe\}_{16-b}$ . Based on the single-crystal X-ray diffraction analysis, the ratio of Co and Fe is 3:2 in  $\{CoFe\}_{16-b}$ .

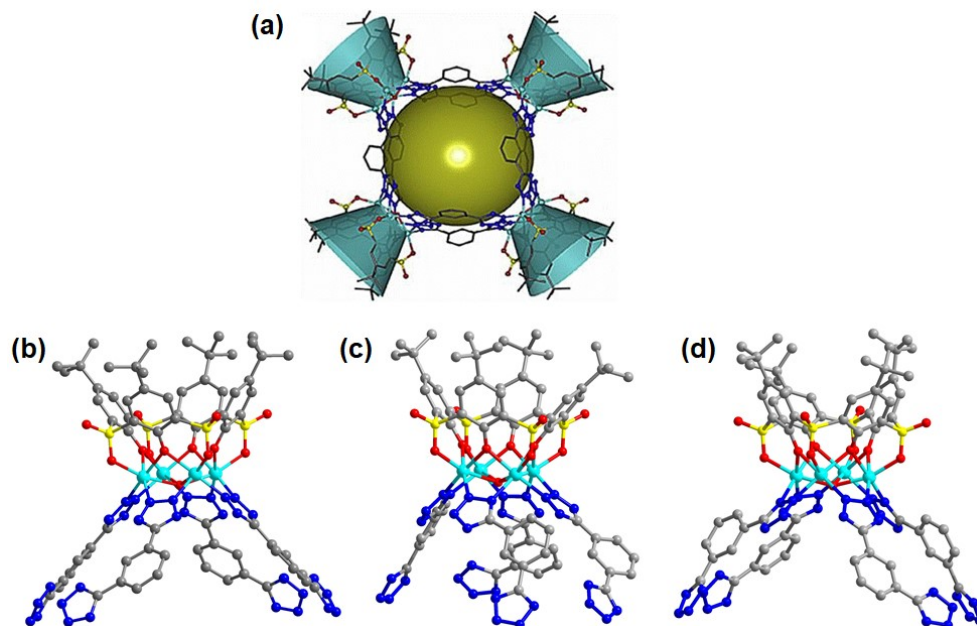

**Figure S3.** (a) {Co<sub>16</sub>} architecture (in literature) assembled from Co<sub>4</sub>-(TC4A-SO<sub>2</sub>) SBUs and BTTAB. (b-d) The coordination modes of Co<sub>4</sub>-(TC4A-SO<sub>2</sub>) units.

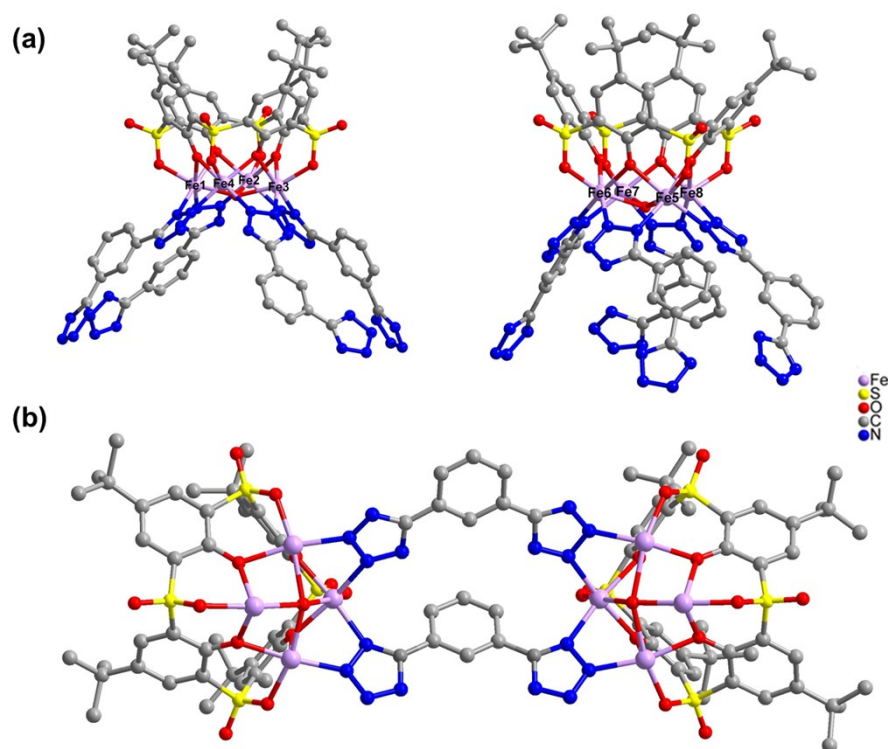

**Figure S4.** The coordination modes of two Fe<sub>4</sub>-(TC4A-SO<sub>2</sub>) units (a) and BTTAB ligand (b) in Fe<sub>16</sub>.

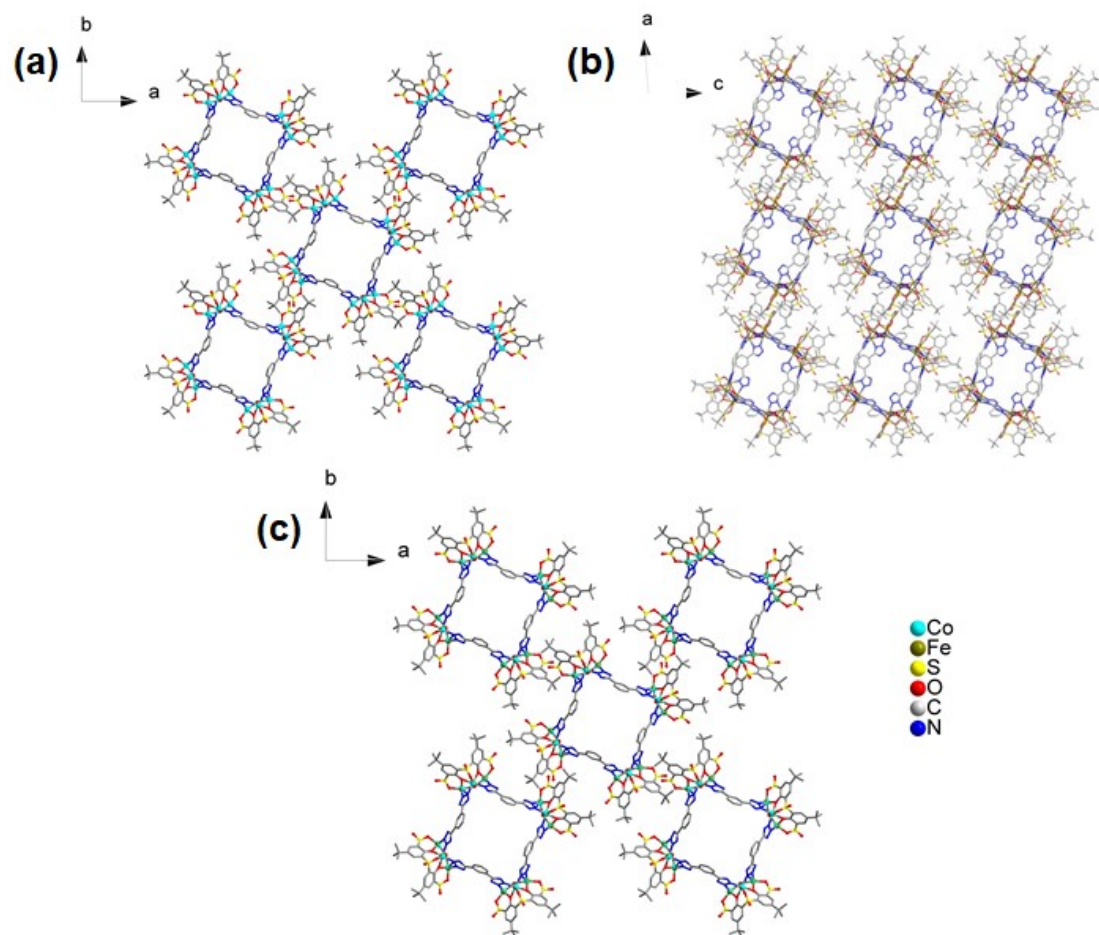

**Figure S5.** The packing diagrams of  $\text{Co}_{16}$  (a),  $\text{Fe}_{16}$  (b) and  $\{\text{CoFe}\}_{16-b}$  (c).

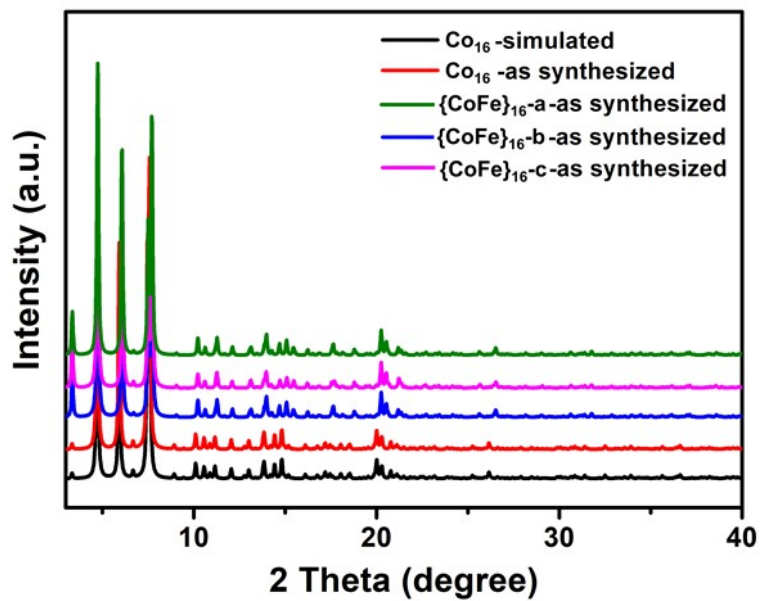

Figure S6. PXRD patterns of  $\text{Co}_{16}$ ,  $\{\text{CoFe}\}_{16}$ -a,  $\{\text{CoFe}\}_{16}$ -b, and  $\{\text{CoFe}\}_{16}$ -c.

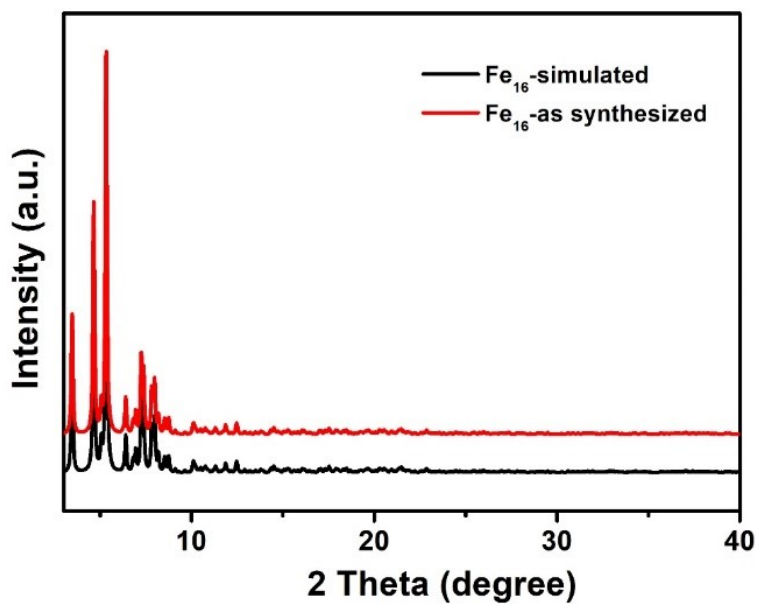

Figure S7. PXRD pattern of  $\text{Fe}_{16}$ .

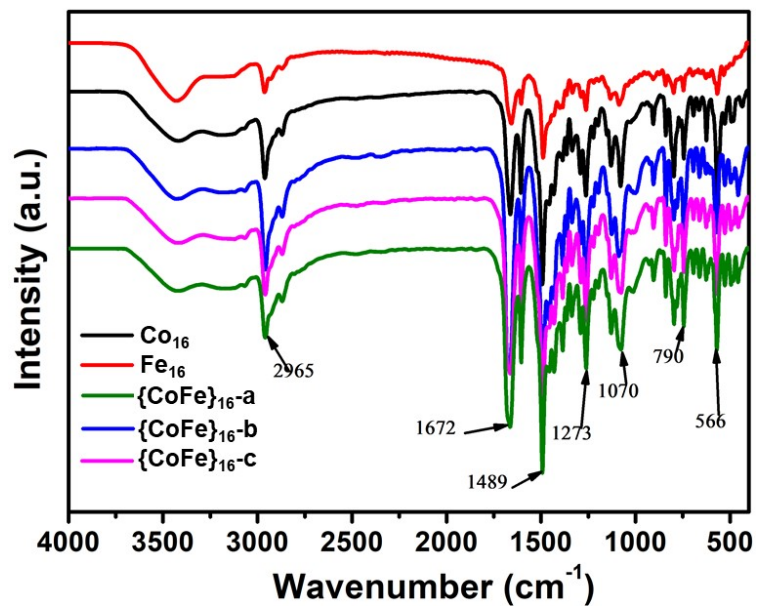

**Figure S8.** FT-IR spectra of Co<sub>16</sub>, Fe<sub>16</sub>, {CoFe}<sub>16</sub>-a, {CoFe}<sub>16</sub>-b, and {CoFe}<sub>16</sub>-c.

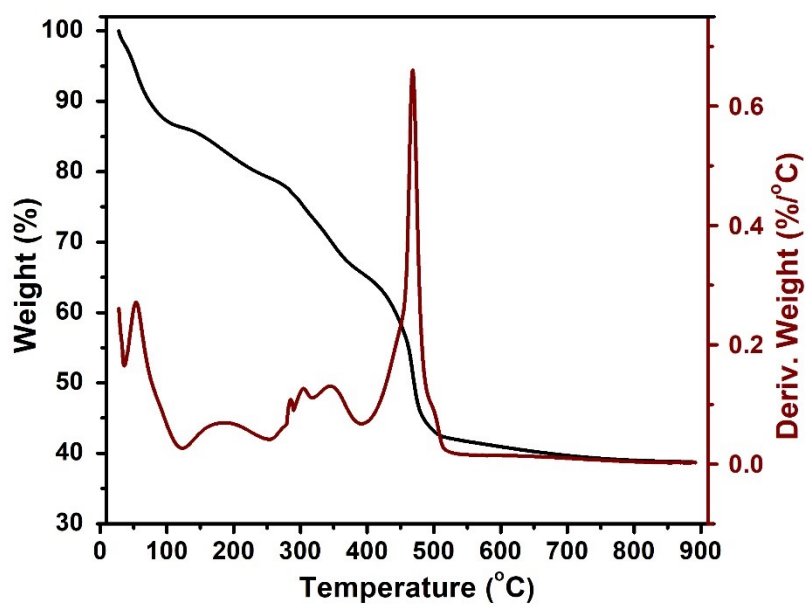

Figure S9. TGA curves of  $\text{Co}_{16}$ .

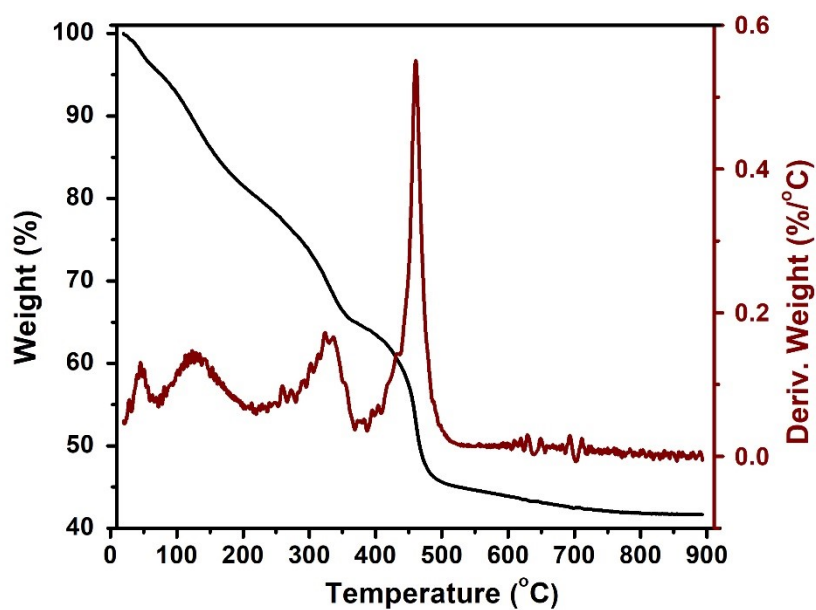

Figure S10. TGA curves of  $\{\text{CoFe}\}_{16}\text{-b}$ .

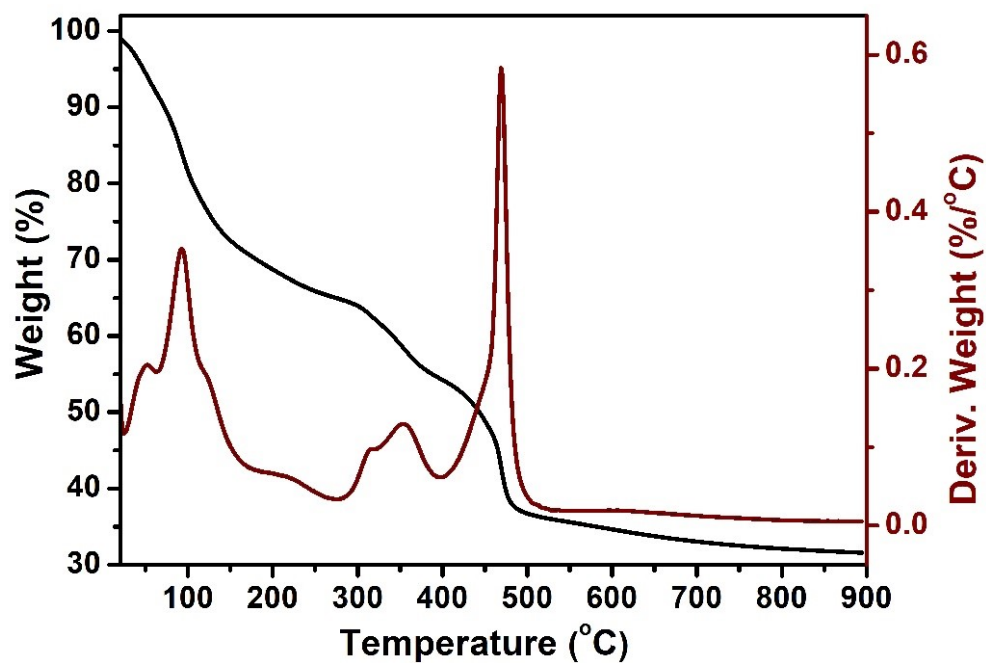

Figure S11. TGA curves of Fe<sub>16</sub>.

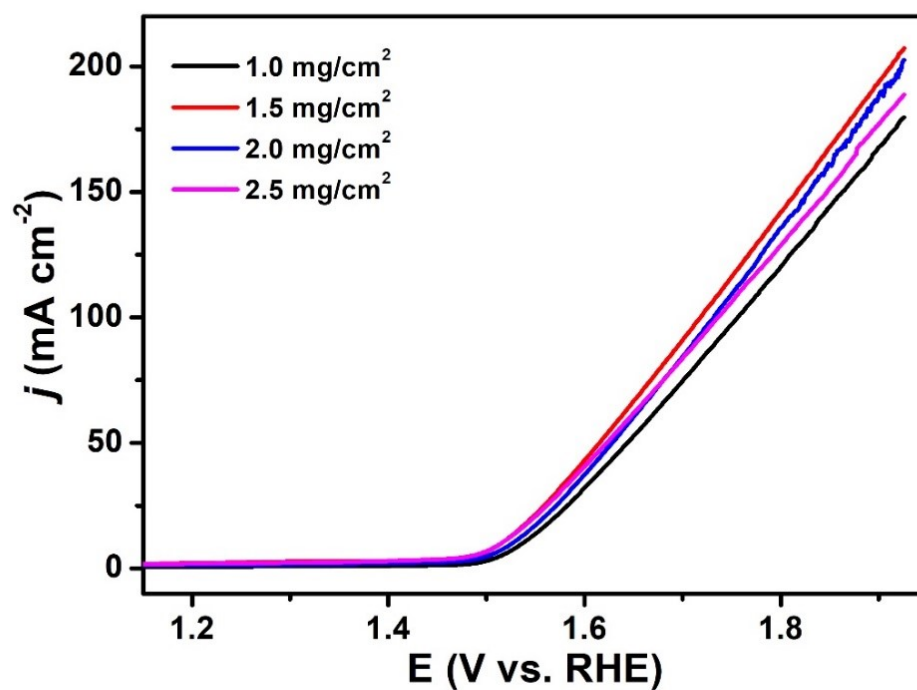

Figure S12. LSV curves of {CoFe}<sub>16</sub>-b/CP at different loading.



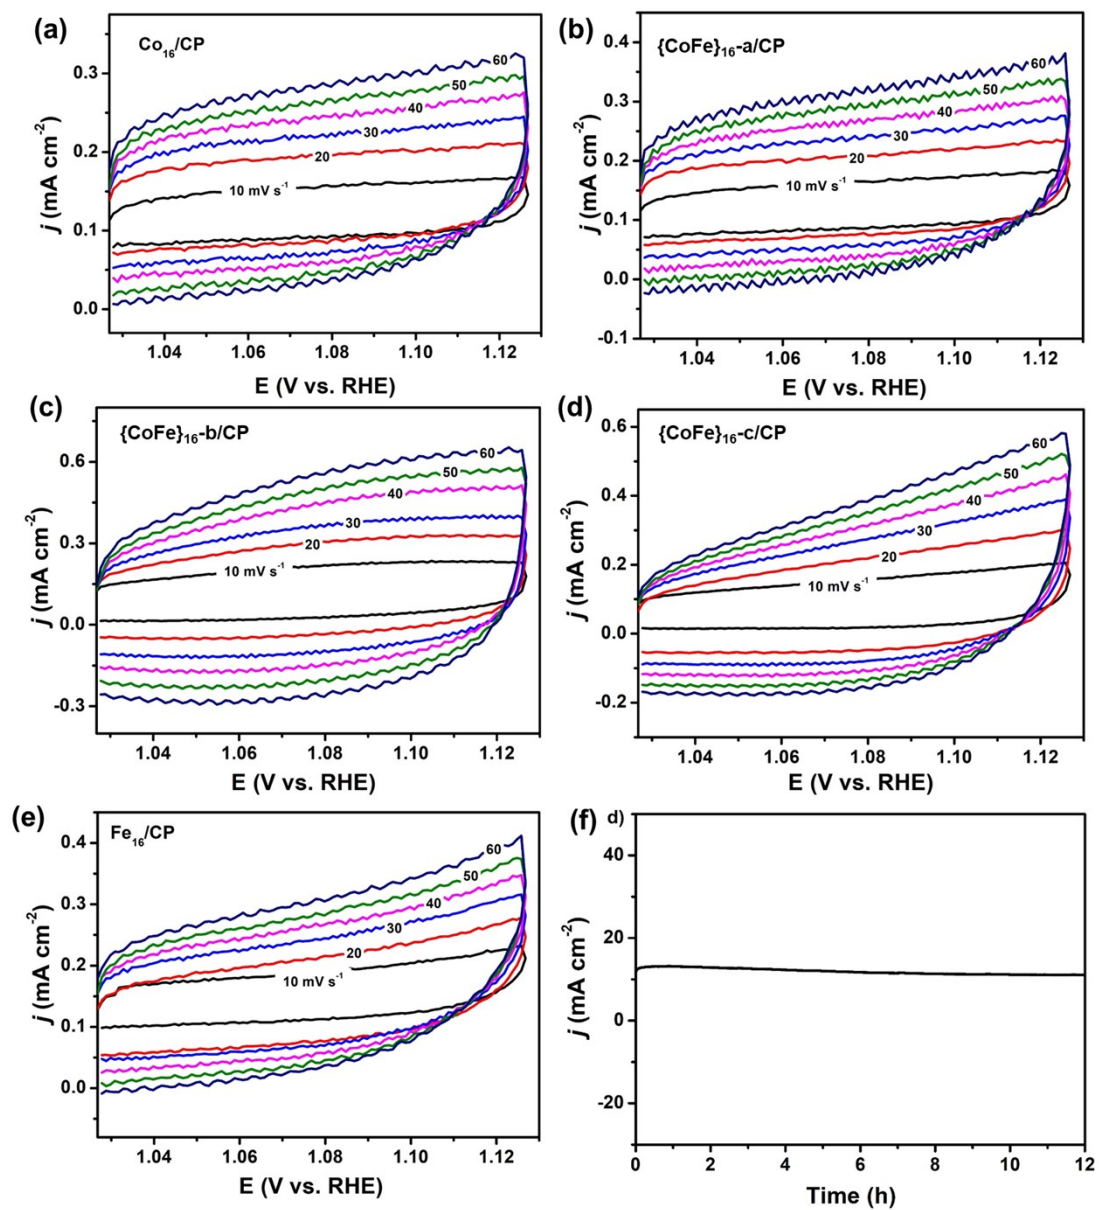

**Figure S13.** Cyclic voltammetry (CV) curves of  $\text{Co}_{16}/\text{CP}$  (a),  $\{\text{CoFe}\}_{16}\text{-a}/\text{CP}$  (b),  $\{\text{CoFe}\}_{16}\text{-b}/\text{CP}$  (c),  $\{\text{CoFe}\}_{16}\text{-c}/\text{CP}$  (d) and  $\text{Fe}_{16}/\text{CP}$  (e); (f)  $i$ - $t$  curve of the  $\{\text{CoFe}\}_{16}\text{-b}/\text{CP}$  catalyst recorded at 1.60 V vs RHE.

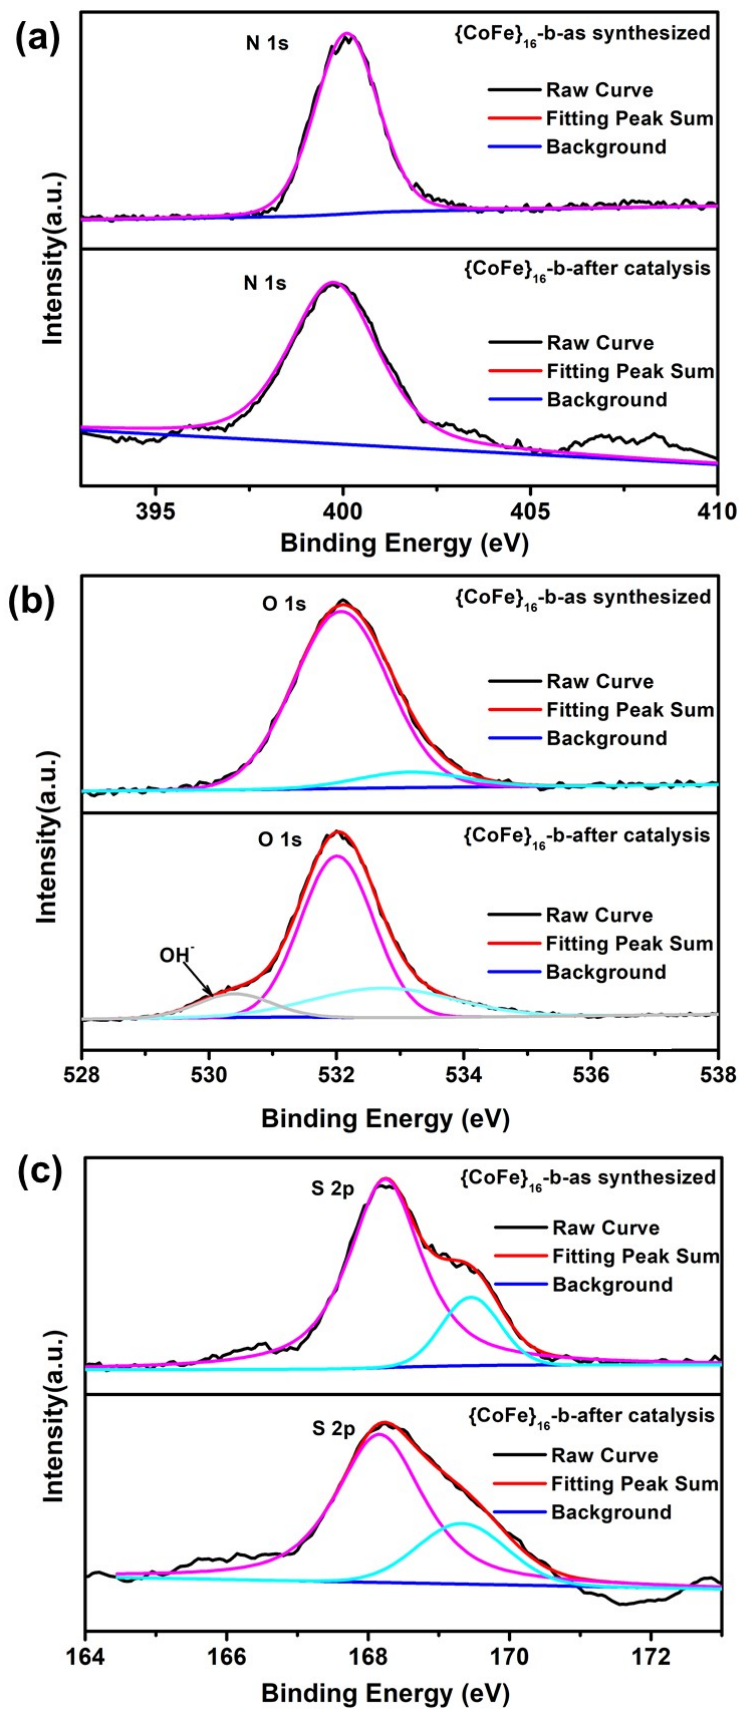

**Figure S14.** High-resolution N 1s (a), O 1s (b), and S 2p (c) XPS spectra of as-synthesized  $\{\text{CoFe}\}_{16}\text{-b}$  and  $\{\text{CoFe}\}_{16}\text{-b}$  after catalysis (after stabilized LSV).

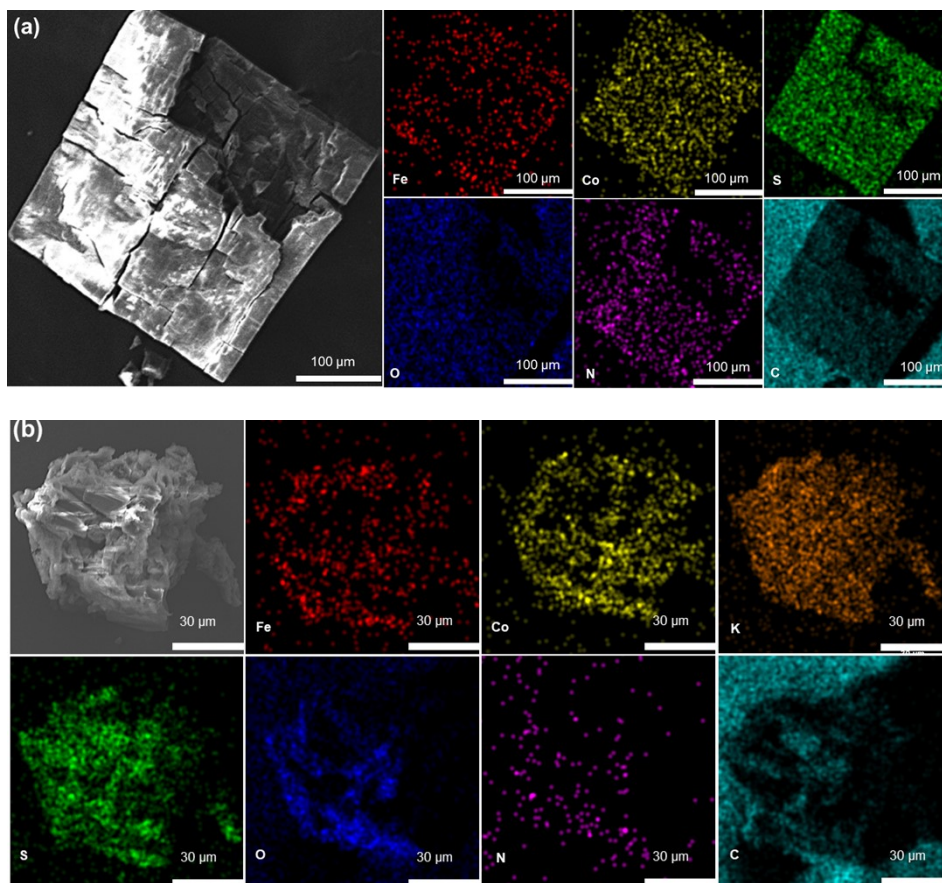

**Figure S15.** Scanning electron microscope (SEM) elemental mapping images of {CoFe}<sub>16</sub>-b at different stage: (a) {CoFe}<sub>16</sub>-b-as-prepared, (b) {CoFe}<sub>16</sub>-b after OER catalysis.

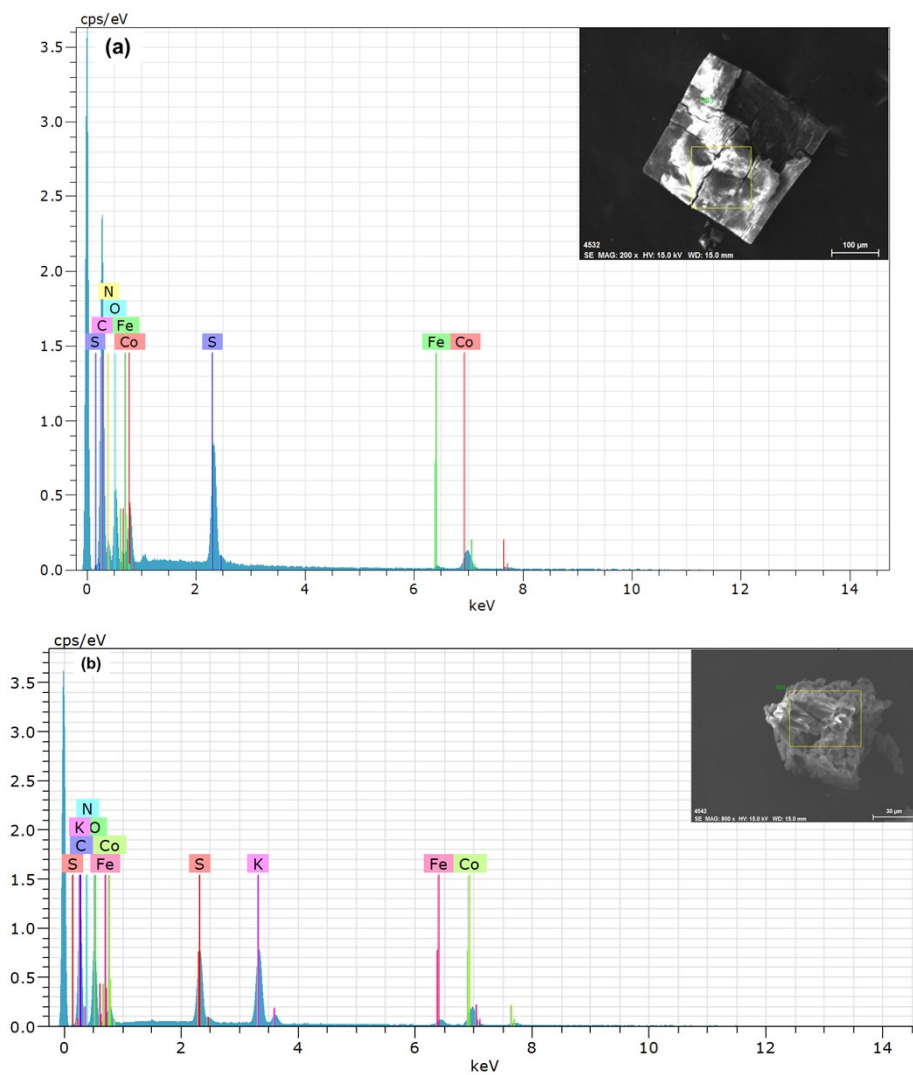

**Figure S16.** Energy-dispersive X-ray spectroscopy (EDS) analysis of  $\{\text{CoFe}\}_{16}\text{-b}$  at different stage: (a)  $\{\text{CoFe}\}_{16}\text{-b}$ -as-prepared, (b)  $\{\text{CoFe}\}_{16}\text{-b}$  after OER catalysis.

**Table S1.** Selected Crystal Data for Clusters **Co<sub>16</sub>**, **Fe<sub>16</sub>** and **{CoFe}<sub>16-b</sub>**.

|                                                                         | <b>Co<sub>16</sub></b>                                                                                | <b>Fe<sub>16</sub></b>                                                                                | <b>{CoFe}<sub>16-b</sub></b>                                                                                               |
|-------------------------------------------------------------------------|-------------------------------------------------------------------------------------------------------|-------------------------------------------------------------------------------------------------------|----------------------------------------------------------------------------------------------------------------------------|
| Formula*                                                                | C <sub>224</sub> H <sub>216</sub><br>N <sub>64</sub> Co <sub>16</sub> O <sub>52</sub> S <sub>16</sub> | C <sub>224</sub> H <sub>216</sub><br>N <sub>64</sub> Fe <sub>16</sub> O <sub>52</sub> S <sub>16</sub> | C <sub>224</sub> H <sub>216</sub> N <sub>64</sub><br>Co <sub>9.60</sub> Fe <sub>6.40</sub> O <sub>52</sub> S <sub>16</sub> |
| Formula Weight*                                                         | 6092.44                                                                                               | 6035.27                                                                                               | 6072.72                                                                                                                    |
| Crystal System                                                          | Tetragonal                                                                                            | Monoclinic                                                                                            | Tetragonal                                                                                                                 |
| Space Group (no.)                                                       | <i>I4/m</i> (No. 87)                                                                                  | <i>C2/c</i> (No. 15)                                                                                  | <i>I4/m</i> (No. 87)                                                                                                       |
| Temperature (K)                                                         | 150 K                                                                                                 | 150 K                                                                                                 | 150 K                                                                                                                      |
| <i>a</i> (Å)                                                            | 37.4109(13)                                                                                           | 51.070(3)                                                                                             | 37.212(3)                                                                                                                  |
| <i>b</i> (Å)                                                            | 37.4109(13)                                                                                           | 17.5178(11)                                                                                           | 37.212(3)                                                                                                                  |
| <i>c</i> (Å)                                                            | 16.2505(7)                                                                                            | 52.146(3)                                                                                             | 15.8033(13)                                                                                                                |
| $\alpha$ (°)                                                            | 90                                                                                                    | 90                                                                                                    | 90                                                                                                                         |
| $\beta$ (°)                                                             | 90                                                                                                    | 94.784(2)                                                                                             | 90                                                                                                                         |
| $\gamma$ (°)                                                            | 90                                                                                                    | 90                                                                                                    | 90                                                                                                                         |
| <i>V</i> (Å <sup>3</sup> )                                              | 22743.8(19)                                                                                           | 46489(5)                                                                                              | 21883(4)                                                                                                                   |
| <i>Z</i>                                                                | 2                                                                                                     | 4                                                                                                     | 2                                                                                                                          |
| <i>D<sub>c</sub></i> (g/cm <sup>-3</sup> ) *                            | 0.890                                                                                                 | 0.862                                                                                                 | 0.920                                                                                                                      |
| $\mu$ (mm <sup>-1</sup> )                                               | 0.689                                                                                                 | 0.602                                                                                                 | 0.685                                                                                                                      |
| <i>F</i> (000)                                                          | 6224                                                                                                  | 12352                                                                                                 | 6195                                                                                                                       |
| Total Data                                                              | 36053                                                                                                 | 132196                                                                                                | 51005                                                                                                                      |
| Unique data                                                             | 7443                                                                                                  | 34333                                                                                                 | 10093                                                                                                                      |
| <i>R</i> <sub>int</sub>                                                 | 0.070                                                                                                 | 0.0752                                                                                                | 0.067                                                                                                                      |
| <i>GOF</i> on <i>F</i> <sup>2</sup>                                     | 1.03                                                                                                  | 1.00                                                                                                  | 1.026                                                                                                                      |
| <i>R</i> <sub>1</sub> <sup>a</sup> [ <i>I</i> >2 $\sigma$ ( <i>I</i> )] | 0.0559                                                                                                | 0.0599                                                                                                | 0.0611                                                                                                                     |
| <i>wR</i> <sub>2</sub> <sup>b</sup>                                     | 0.1933                                                                                                | 0.1798                                                                                                | 0.2115                                                                                                                     |

<sup>a</sup> $R_1 = \frac{\sum ||F_o| - |F_c||}{\sum |F_o|}$ ; <sup>b</sup> $wR_2 = \left\{ \frac{\sum [w(F_o^2 - F_c^2)^2]}{\sum [w(F_o^2)^2]} \right\}^{1/2}$

**Table S2.** Selected bond distances (Å) and BVS calculations for **Co<sub>16</sub>**, **{CoFe}<sub>16</sub>-b**, and **Fe<sub>16</sub>**

| <b>Co<sub>16</sub></b>                                    |            |      |              |                         |           |      |              |
|-----------------------------------------------------------|------------|------|--------------|-------------------------|-----------|------|--------------|
| Band                                                      | Distance   | r    | Value        | Band                    | Distance  | r    | Value        |
| Co(1)-O(3)                                                | 2.071(4)   | 1.69 | 0.359        | Co(3)-O(7)              | 2.069(5)  | 1.69 | 0.361        |
| Co(1)-O(1)                                                | 2.088(3)   | 1.69 | 0.343        | Co(3)-N(8)              | 2.099(4)  | 1.84 | 0.497        |
| Co(1)-O(1) <sup>b</sup>                                   | 2.088(3)   | 1.69 | 0.343        | Co(3)-N(8) <sup>b</sup> | 2.099(4)  | 1.84 | 0.497        |
| Co(1)-N(2)                                                | 2.108(4)   | 1.84 | 0.485        | Co(3)-O(2)              | 2.106(4)  | 1.69 | 0.327        |
| Co(1)-N(2) <sup>b</sup>                                   | 2.108(4)   | 1.84 | 0.485        | Co(3)-O(2) <sup>b</sup> | 2.106(4)  | 1.69 | 0.327        |
| Co(1)-O(9)                                                | 2.171(4)   | 1.69 | 0.274        | Co(3)-O(9)              | 2.190(4)  | 1.69 | 0.260        |
| valence                                                   |            |      | <b>2.288</b> | valence                 |           |      | <b>2.268</b> |
| Co(2)-N(9) <sup>a</sup>                                   | 2.070(4)   | 1.84 | 0.537        |                         |           |      |              |
| Co(2)-O(5)                                                | 2.071(4)   | 1.69 | 0.359        |                         |           |      |              |
| Co(2)-N(3)                                                | 2.074(4)   | 1.84 | 0.531        |                         |           |      |              |
| Co(2)-O(1)                                                | 2.075(3)   | 1.69 | 0.355        |                         |           |      |              |
| Co(2)-O(2)                                                | 2.077(3)   | 1.69 | 0.353        |                         |           |      |              |
| Co(2)-O(9)                                                | 2.2045(14) | 1.69 | 0.250        |                         |           |      |              |
| valence                                                   |            |      | <b>2.386</b> |                         |           |      |              |
| Symmetry Code a: 1-y, x, z; b: x, y, 1-z; c: 1-y, x, 1-z. |            |      |              |                         |           |      |              |
| <b>{CoFe}<sub>16</sub>-b</b>                              |            |      |              |                         |           |      |              |
| Band                                                      | Distance   | r    | Value        | Band                    | Distance  | r    | Value        |
| Co(1)-O(3)                                                | 2.058(5)   | 1.69 | 0.332        | Fe(1)-O(3)              | 2.055(12) | 1.73 | 0.487        |
| Co(1)-O(1)                                                | 2.094(4)   | 1.69 | 0.305        | Fe(1)-N(1) <sup>a</sup> | 2.102(10) | 1.86 | 0.444        |
| Co(1)-O(1) <sup>a</sup>                                   | 2.094(4)   | 1.69 | 0.305        | Fe(1)-N(1)              | 2.102(10) | 1.86 | 0.444        |
| Co(1)-N(1)                                                | 2.113(4)   | 1.84 | 0.527        | Fe(1)-O(1) <sup>a</sup> | 2.107(10) | 1.73 | 0.426        |
| Co(1)-N(1) <sup>a</sup>                                   | 2.114(5)   | 1.84 | 0.527        | Fe(1)-O(1)              | 2.107(10) | 1.73 | 0.426        |
| Co(1)-O(9)                                                | 2.164(5)   | 1.69 | 0.302        | Fe(1)-O(9)              | 2.225 (5) | 1.73 | 0.276        |
| valence                                                   |            |      | <b>2.299</b> | valence                 |           |      | <b>2.504</b> |
| Co(2)-N(2)                                                | 2.060(5)   | 1.84 | 0.565        | Fe(2)-O(2)              | 2.056(7)  | 1.73 | 0.429        |
| Co(2)-N(6) <sup>b</sup>                                   | 2.070(5)   | 1.84 | 0.531        | Fe(2)-N(6) <sup>b</sup> | 2.065(7)  | 1.86 | 0.581        |
| Co(2)-O(1)                                                | 2.070(5)   | 1.69 | 0.363        | Fe(2)-O(1)              | 2.071(7)  | 1.73 | 0.399        |
| Co(2)-O(5)                                                | 2.076(5)   | 1.69 | 0.356        | Fe(2)-O(5)              | 2.082(6)  | 1.73 | 0.387        |
| Co(2)-O(2)                                                | 2.093(5)   | 1.69 | 0.331        | Fe(2)-N(2)              | 2.096(7)  | 1.86 | 0.517        |
| Co(2)-O(9)                                                | 2.238(4)   | 1.69 | 0.226        | Fe(2)-O(9)              | 2.225(5)  | 1.73 | 0.267        |
| valence                                                   |            |      | <b>2.373</b> | valence                 |           |      | <b>2.581</b> |
| Co(3)-O(7)                                                | 2.073(5)   | 1.69 | 0.338        | Fe(3)-O(7)              | 2.054(13) | 1.73 | 0.449        |
| Co(3)-N(7) <sup>b</sup>                                   | 2.116(4)   | 1.84 | 0.498        | Fe(3)-O(2)              | 2.108(9)  | 1.73 | 0.393        |
| Co(3)-N(7) <sup>c</sup>                                   | 2.116(4)   | 1.84 | 0.498        | Fe(3)-O(2)              | 2.109(9)  | 1.73 | 0.393        |
| Co(3)-O(2) <sup>a</sup>                                   | 2.122(4)   | 1.69 | 0.296        | Fe(3)-N(7) <sup>b</sup> | 2.131(8)  | 1.86 | 0.444        |
| Co(3)-O(2)                                                | 2.122(4)   | 1.69 | 0.296        | Fe(3)-N(7) <sup>c</sup> | 2.131(8)  | 1.86 | 0.444        |
| Co(3)-O(9)                                                | 2.151(5)   | 1.69 | 0.299        | Fe(3)-O(9)              | 2.165(13) | 1.73 | 0.300        |
| valence                                                   |            |      | <b>2.226</b> | valence                 |           |      | <b>2.423</b> |
| Symmetry Code a: x, y, 2-z; b: y, 1-x, z; c: y, 1-x, 2-z. |            |      |              |                         |           |      |              |

| Fe <sub>16</sub>                  |          |      |              |                          |           |      |              |
|-----------------------------------|----------|------|--------------|--------------------------|-----------|------|--------------|
| Band                              | Distance | r    | Value        | Band                     | Distance  | r    | Value        |
| Fe(1)-O(5)                        | 2.060(3) | 1.73 | 0.414        | Fe(5)-O(17)              | 2.097(3)  | 1.73 | 0.394        |
| Fe(1)-N(10)                       | 2.119(4) | 1.86 | 0.497        | Fe(5)-O(13)              | 2.118(3)  | 1.73 | 0.354        |
| Fe(1)-O(4)                        | 2.131(3) | 1.73 | 0.342        | Fe(5)-N(14)              | 2.125(4)  | 1.86 | 0.489        |
| Fe(1)-O(25)                       | 2.138(3) | 1.73 | 0.336        | Fe(5)-O(26)              | 2.166(3)  | 1.73 | 0.311        |
| Fe(1)-N(1)                        | 2.161(4) | 1.86 | 0.443        | Fe(5)-N(5)               | 2.182(4)  | 1.86 | 0.419        |
| Fe(1)-O(1)                        | 2.197(3) | 1.73 | 0.286        | Fe(5)-O(16)              | 2.211(3)  | 1.73 | 0.275        |
| valence                           |          |      | <b>2.318</b> | valence                  |           |      | <b>2.242</b> |
| Fe(2)-O(2)                        | 2.057(3) | 1.73 | 0.418        | Fe(6)-O(19)              | 2.095(3)  | 1.73 | 0.377        |
| Fe(2)-N(11)                       | 2.100(4) | 1.86 | 0.523        | Fe(6)-O(13)              | 2.103(3)  | 1.73 | 0.369        |
| Fe(2)-O(7)                        | 2.109(3) | 1.73 | 0.363        | Fe(6)-N(6)               | 2.110(4)  | 1.86 | 0.509        |
| Fe(2)-N(30) <sup>a</sup>          | 2.123(4) | 1.86 | 0.491        | Fe(6)-O(14)              | 2.119(3)  | 1.73 | 0.353        |
| Fe(2)-O(1)                        | 2.146(3) | 1.73 | 0.328        | Fe(6)-N(26)              | 2.123(4)  | 1.86 | 0.491        |
| Fe(2)-O(25)                       | 2.264(3) | 1.73 | 0.239        | Fe(6)-O(26)              | 2.190(3)  | 1.73 | 0.292        |
| valence                           |          |      | <b>2.362</b> | valence                  |           |      | <b>2.391</b> |
| Fe(3)-O(9)                        | 2.062(3) | 1.73 | 0.412        | Fe(7)-O(21)              | 2.088(3)  | 1.73 | 0.384        |
| Fe(3)-O(25)                       | 2.135(3) | 1.73 | 0.338        | Fe(7)-O(15)              | 2.106(3)  | 1.73 | 0.366        |
| Fe(3)-O(2)                        | 2.145(3) | 1.73 | 0.329        | Fe(7)-N(23) <sup>a</sup> | 2.118(4)  | 1.86 | 0.498        |
| Fe(3)-N(19)                       | 2.147(4) | 1.86 | 0.460        | Fe(7)-N(25)              | 2.030(5)  | 1.86 | 0.481        |
| Fe(3)-N(29) <sup>a</sup>          | 2.166(4) | 1.86 | 0.437        | Fe(7)-O(14)              | 2.139(3)  | 1.73 | 0.335        |
| Fe(3)-O(3)                        | 2.198(3) | 1.73 | 0.285        | Fe(7)-O(26)              | 2.2532(3) | 1.73 | 0.246        |
| valence                           |          |      | <b>2.263</b> | valence                  |           |      | <b>2.309</b> |
| Fe(4)-O(4)                        | 2.047(3) | 1.73 | 0.429        | Fe(8)-O(23)              | 2.076(3)  | 1.73 | 0.397        |
| Fe(4)-N(18)                       | 2.088(4) | 1.86 | 0.540        | Fe(8)-O(15)              | 2.091(3)  | 1.73 | 0.381        |
| Fe(4)-O(11)                       | 2.107(3) | 1.73 | 0.365        | Fe(8)-N(22) <sup>a</sup> | 2.105(4)  | 1.86 | 0.516        |
| Fe(4)-O(3)                        | 2.110(3) | 1.73 | 0.362        | Fe(8)-N(15)              | 2.110(4)  | 1.86 | 0.509        |
| Fe(4)-N(2)                        | 2.127(4) | 1.86 | 0.486        | Fe(8)-O(16)              | 2.110(3)  | 1.73 | 0.362        |
| Fe(4)-O(25)                       | 2.308(3) | 1.73 | 0.212        | Fe(8)-O(26)              | 2.616(2)  | 1.73 | 0.262        |
| valence                           |          |      | <b>2.394</b> | valence                  |           |      | <b>2.426</b> |
| Symmetry Code a: 3/2-x,3/2-y,1-z. |          |      |              |                          |           |      |              |

Note: BVS calculations reveal that all the ions in these clusters are divalent.

**Table S3.** ICP-AES analysis of catalysts {CoFe}<sub>16</sub>-a, {CoFe}<sub>16</sub>-b, and {CoFe}<sub>16</sub>-c.

| Catalysts               | Co (ppm) | Fe (ppm) | Co: Fe (molar ratio) | Experimental value                   |
|-------------------------|----------|----------|----------------------|--------------------------------------|
| {CoFe} <sub>16</sub> -a | 1362.0   | 56.55    | 24.10 : 1            | Co <sub>15.4</sub> Fe <sub>0.6</sub> |
| {CoFe} <sub>16</sub> -b | 977.6    | 635.1    | 1.54 : 1             | Co <sub>9.7</sub> Fe <sub>6.3</sub>  |
| {CoFe} <sub>16</sub> -c | 639.5    | 910.9    | 1 : 1.42             | Co <sub>6.4</sub> Fe <sub>9.6</sub>  |
